# Supplementary material for: Homocysteine directly interacts and activates the angiotensin II type I receptor to aggravate vascular injury
Source: PubMed Central journal article supplement (PMC5750214; doi:10.1038/s41467-017-02401-7), 2018-01-02
Supplement: 41467_2017_2401_MOESM1_ESM.pdf [file 41467_2017_2401_MOESM1_ESM.pdf]

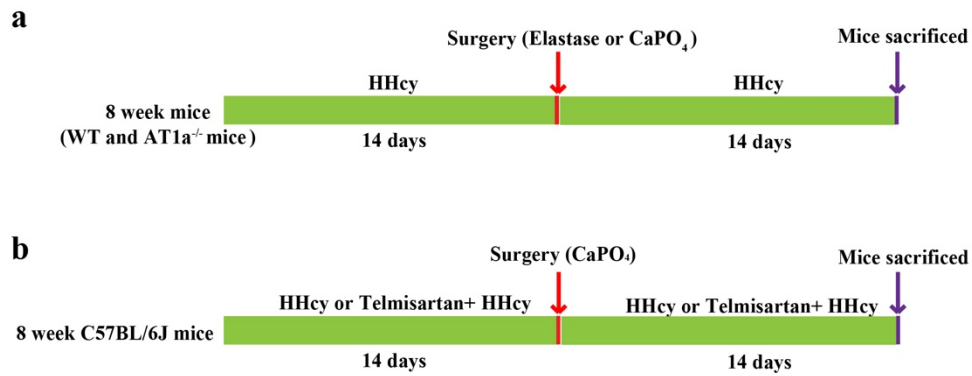

**Supplementary Figure 1. Schematic flowcharts of animal models.** **a**, Schematic flowchart of HHcy induction and elastase or CaPO<sub>4</sub> treatment in Figure 1a-d and Supplementary Figure 2a-c. **b**, Schematic flowchart of HHcy induction, telmisartan treatment and CaPO<sub>4</sub> treatment in Supplementary Figure 3a-c.

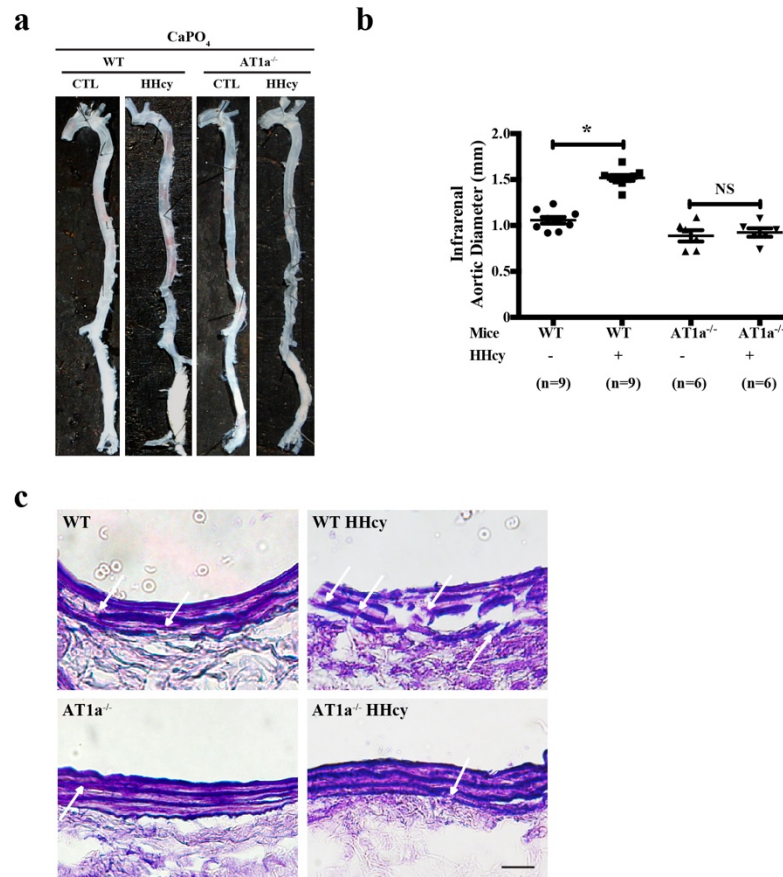

**Supplementary Figure 2. HHcy aggravates CaPO<sub>4</sub>-induced AAA in WT but not *AT1a*<sup>-/-</sup> mice.** **a**, Representative photographs of CaPO<sub>4</sub>-induced AAA in WT and *AT1a*<sup>-/-</sup> mice, N=6-9. **b**, The quantification of the infrarenal abdominal aortic diameter in mice with CaPO<sub>4</sub>-induced aneurysms. N=6-9. \**P*<0.05. Kruskal-Wallis test followed by Dunn's test. **c**, Representative Gomori staining of elastin degradation. Scale bar, 20 μm, N=6-9.

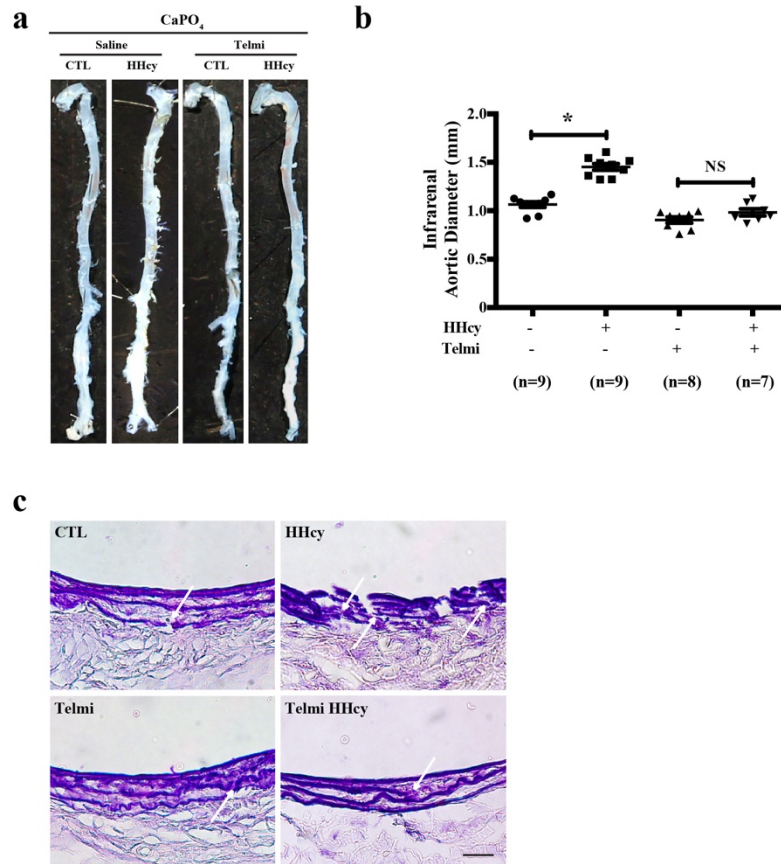

**Supplementary Figure 3. Telmisartan treatment rescues HHcy-aggravated AAA in mice.** **a**, Representative photographs of CaPO<sub>4</sub>-induced AAA in C57BL/6J mice fed with or without telmisartan and Hcy. Control (CTL), CaPO<sub>4</sub> treatment; HHcy, Hcy (1.8 g/L) in drinking water plus CaPO<sub>4</sub> treatment; Telmi, telmisartan in drinking water plus CaPO<sub>4</sub> treatment; Telmi + HHcy, telmisartan and Hcy in drinking water plus CaPO<sub>4</sub> treatment, N=7-9. **b**, The quantification of the abdominal diameter in mice with CaPO<sub>4</sub>-induced aneurysms. N=7-9, \**P*<0.05, Kruskal-Wallis test followed by Dunn's test. **c**, Representative Gomori staining of elastin degradation. Scale bar, 20 μm, N=7-9.

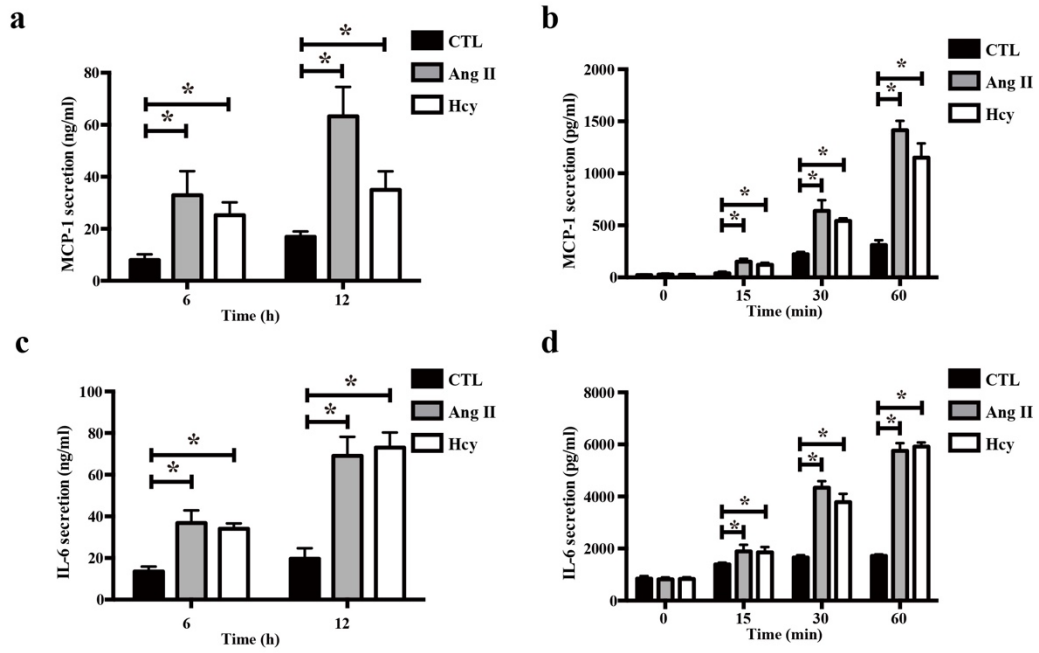

**Supplementary Figure 4. Hcy induces MCP-1 and IL-6 secretion. a-b,** Ang II (1  $\mu$ M)- or Hcy (100  $\mu$ M)-induced C57BL/6J mice abdominal aortic ring MCP-1 secretion at different time points. The data represent as mean  $\pm$  SEM, N=6, \* $P$ <0.05, One-way ANOVA followed by the Bonferroni post hoc test. **c-d,** Ang II (1  $\mu$ M)- or Hcy (100  $\mu$ M)-induced C57BL/6J mice abdominal aortic ring IL-6 secretion at different time points. The data represent as mean  $\pm$  SEM, N=6, \* $P$ <0.05, One-way ANOVA followed by the Bonferroni post hoc test.

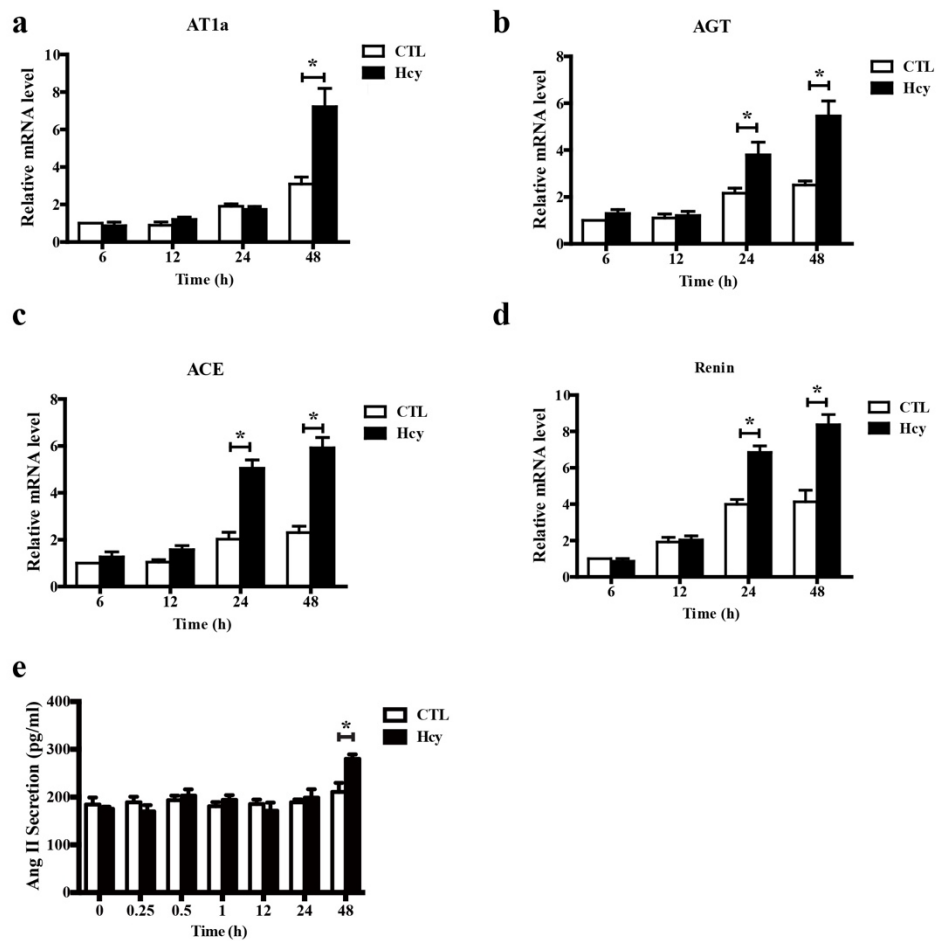

**Supplementary Figure 5. Hcy does not upregulate RAAS expression until 24 to 48 hours and does not affect Ang II production.** a-d, Hcy-induced mice abdominal aortic ring AT1a, AGT, ACE and renin mRNA transcription at different time points. The data represent as mean  $\pm$  SEM, N=6, \* $P$ <0.05, Student's t-test. e, Hcy-induced mice abdominal aortic ring Ang II secretion at different time points. The data represent as mean  $\pm$  SEM, N=6, \* $P$ <0.05, Student's t-test.

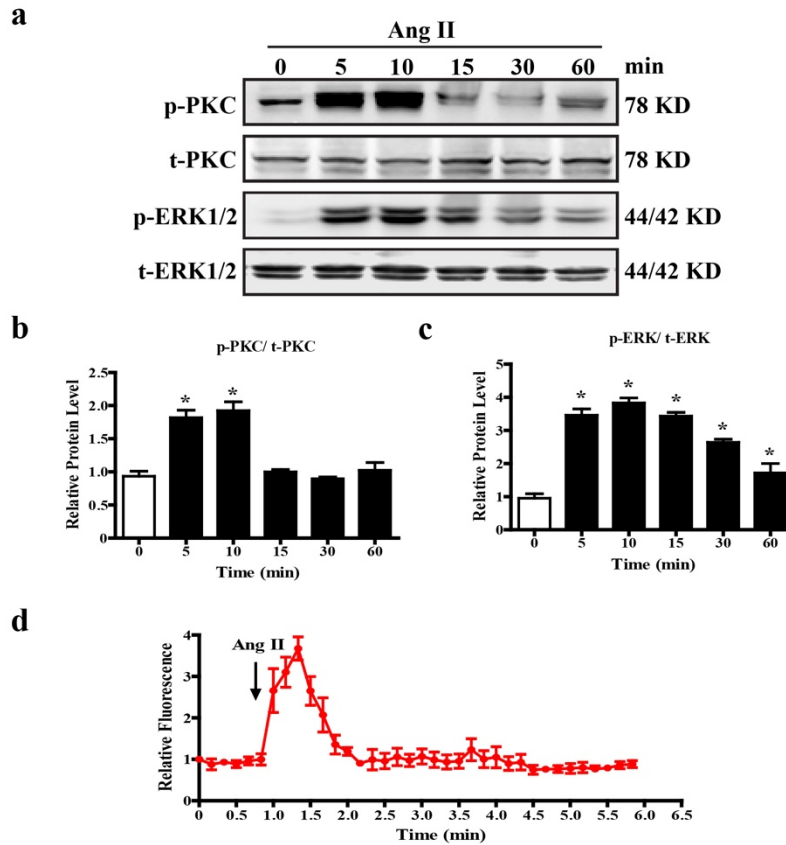

**Supplementary Figure 6. Ang II activates AT1 receptor  $G_q$  signaling.** **a-c**, Representative Western blots and quantification of phosphorylated and total PKC and ERK1/2 in Ang II ( $1 \mu\text{M}$ )-treated HEK293A cells (transfected with the human AT1 receptor). The data represent as mean  $\pm$  SEM,  $N=6$ ,  $*P<0.05$ , One-way ANOVA followed by the Bonferroni post hoc test **d**,  $\text{Ca}^{2+}$  signaling in HEK293A cells (transfected with the human AT1 receptor) stimulated with Ang II ( $1 \mu\text{M}$ ). The data represent as mean  $\pm$  SEM,  $N=6$ .

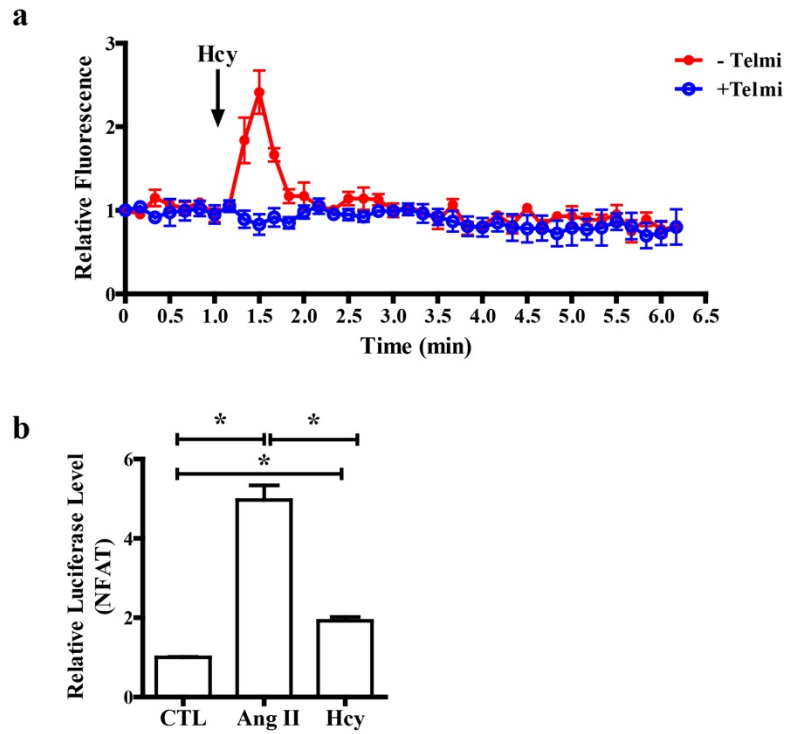

**Supplementary Figure 7. Hcy induces  $Ca^{2+}$  and NFAT signaling.** **a**,  $Ca^{2+}$  signaling in HEK293A cells (transfected with the human AT1 receptor) stimulated with Hcy (100  $\mu$ M) with or without telmisartan (1  $\mu$ M). The data represent as mean  $\pm$  SEM, N=6. **b**, Hcy (100  $\mu$ M) and Ang II (1  $\mu$ M)-induced NFAT signaling. The data represent as mean  $\pm$  SEM, N=6, \* $P$ <0.05, One-way ANOVA followed by the Bonferroni post hoc test.

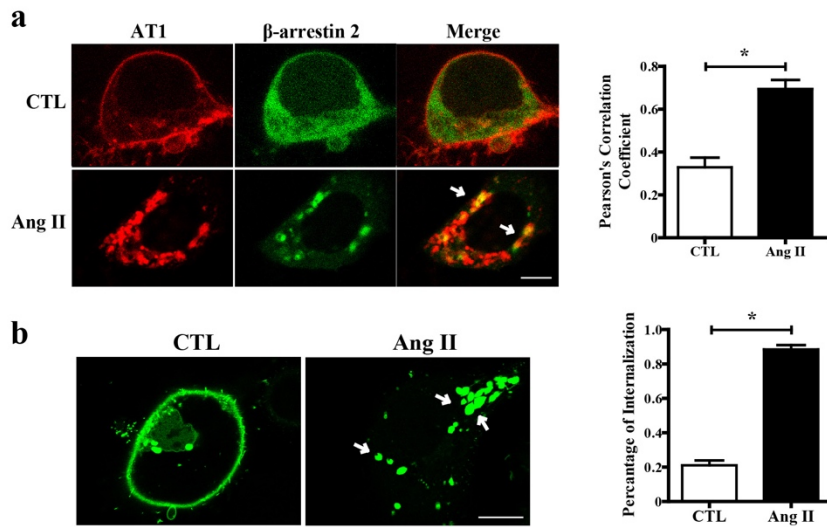

**Supplementary Figure 8. Ang II activates AT1 receptor  $\beta$ -arrestin 2 signaling. a,** Representative fluorescence and quantification of Ang II (1  $\mu$ M)-induced colocalization of the AT1 receptor (human AT1 receptor labeled with mCherry; red) with  $\beta$ -arrestin 2 ( $\beta$ -arrestin 2 labeled with GFP; green) in cultured HEK293A cells. The merged area is indicated as yellow (arrows). Scale bar, 10  $\mu$ m. The data represent as mean  $\pm$  SEM, N=6, \* $P$ <0.05, Mann-Whitney test. **b,** Representative fluorescence and quantification of Ang II (1  $\mu$ M)-induced AT1 receptor (mouse AT1a receptor labeled with GFP; green) internalization (arrows) in COS7 cells. The data represent as mean  $\pm$  SEM, N=10, \* $P$ <0.05, Mann-Whitney test.



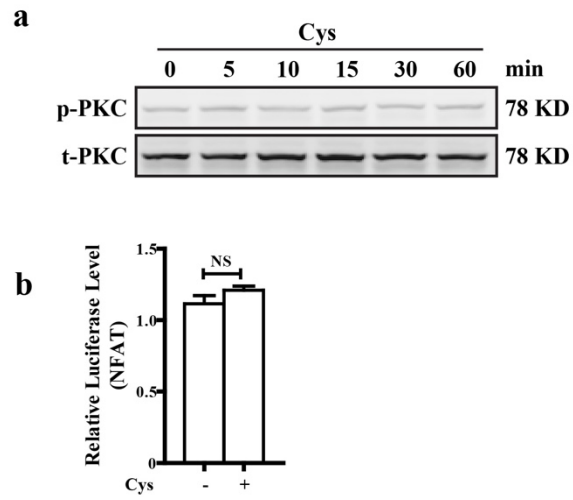

**Supplementary Figure 9. Cysteine does not activate the AT1 receptor.** **a**, Representative Western blots of phosphorylated and total PKC in cysteine (100  $\mu$ M)-treated HEK293A cells (transfected with the human AT1 receptor). N=6. **b**, NFAT signaling of HEK293A cells (transfected with the human AT1 receptor) after cysteine (100  $\mu$ M) treatment, detected by the dual luciferase assay system (Promega). The data represent as mean  $\pm$  SEM, N=6. NS, no significance, Student's t-test.

**a**

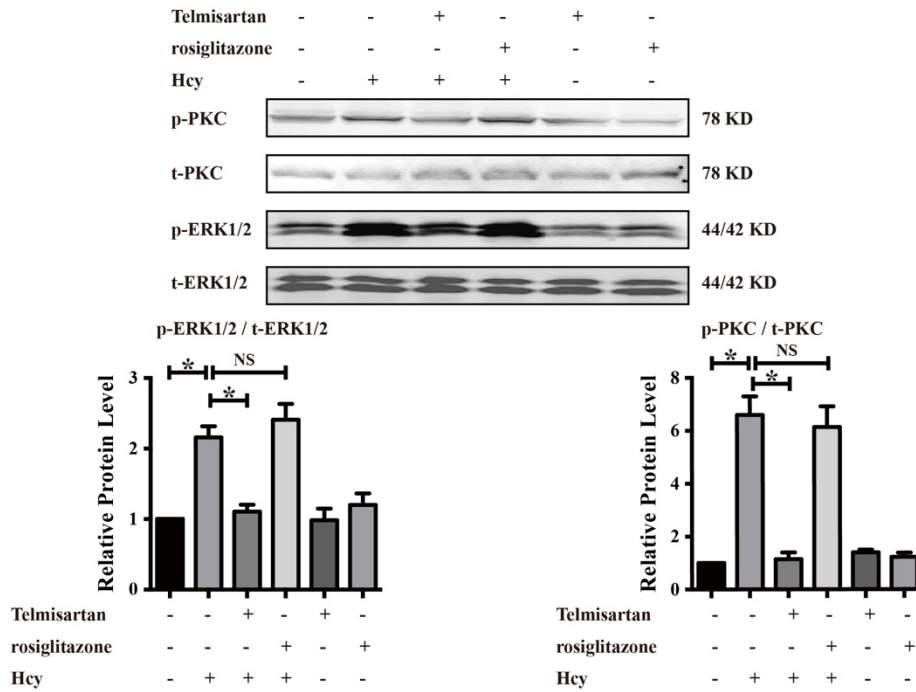

**b**

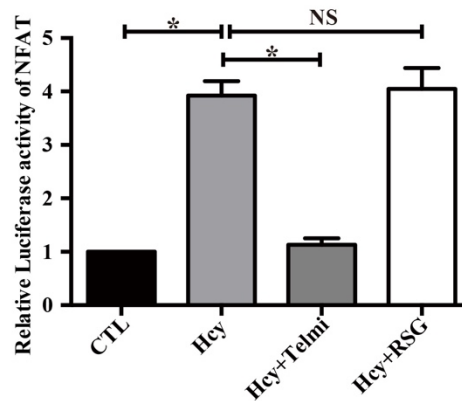

**Supplementary Figure 10. Sartans inhibited Hcy-induced AT1 activation independent on its PPAR $\gamma$ -activating effect.** **a**, Representative Western blots and quantification of phosphorylated and total PKC and ERK1/2 in Hcy (100  $\mu$ M)-treated HEK293A cells (transfected with the human AT1 receptor) with or without telmisartan (1  $\mu$ M) or rosiglitazone (20  $\mu$ M). The data represent as mean  $\pm$  SEM, N=6. \* $P$ <0.05. One-way ANOVA followed by the Bonferroni post hoc test. **b**, Hcy (100  $\mu$ M) -induced NFAT signaling with or without telmisartan (1  $\mu$ M) and rosiglitazone (20  $\mu$ M). The data represent as mean  $\pm$  SEM, N=6. \* $P$ <0.05, NS, no significance. One-way ANOVA followed by the Bonferroni post hoc test.

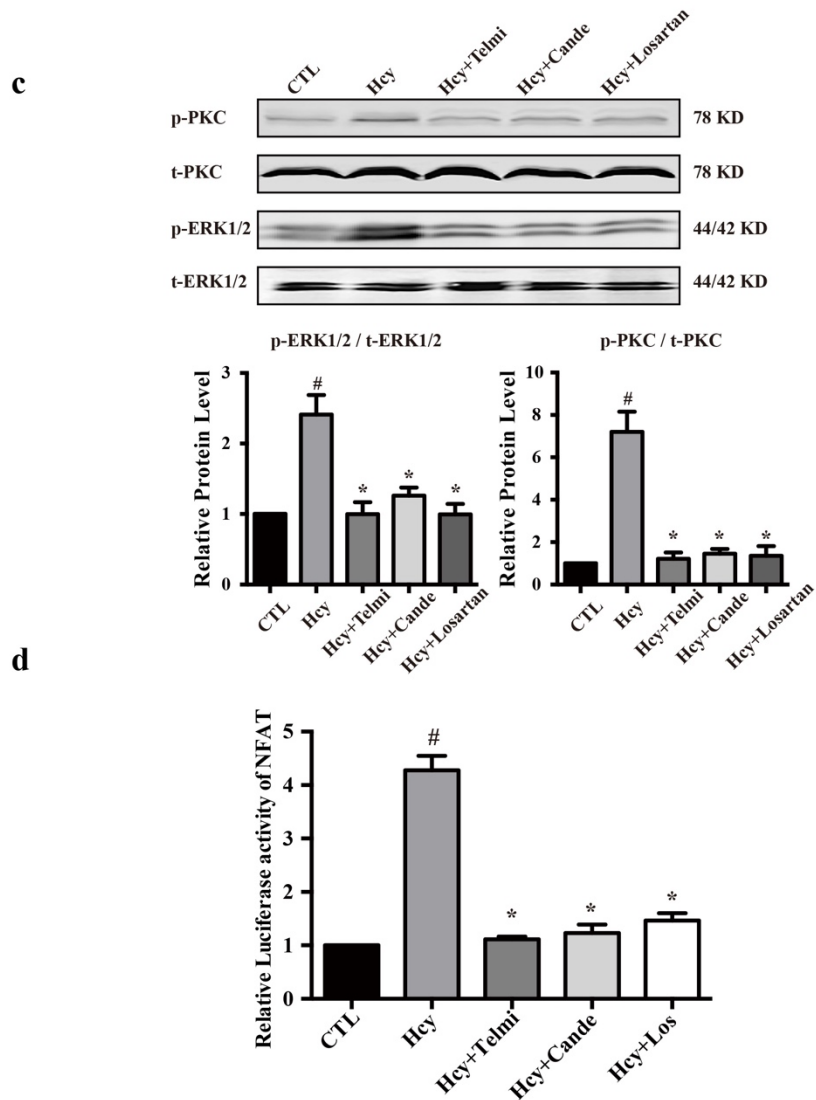

**Supplementary Figure 10. Sartans inhibited Hcy-induced AT1 activation independent on its PPAR $\gamma$ -activating effect.** **c**, Representative Western blots and quantification of phosphorylated and total PKC and ERK1/2 in Hcy (100  $\mu$ M)-treated HEK293A cells (transfected with the human AT1 receptor) with telmisartan (1  $\mu$ M), candesartan (1  $\mu$ M) or losartan (1  $\mu$ M). The data represent as mean  $\pm$  SEM, N=6. <sup>#</sup> $P$ <0.05 vs. CTL. Hcy. <sup>\*</sup> $P$ <0.05 vs. Hcy. One-way ANOVA followed by the Bonferroni post hoc test. **d**, Hcy (100  $\mu$ M) -induced NFAT signaling with telmisartan (1  $\mu$ M), candesartan (1  $\mu$ M) or losartan (1  $\mu$ M). The data represent as mean  $\pm$  SEM, N=6. <sup>#</sup> $P$ <0.05 vs. CTL. Hcy. <sup>\*</sup> $P$ <0.05 vs. Hcy. One-way ANOVA followed by the Bonferroni post hoc test.

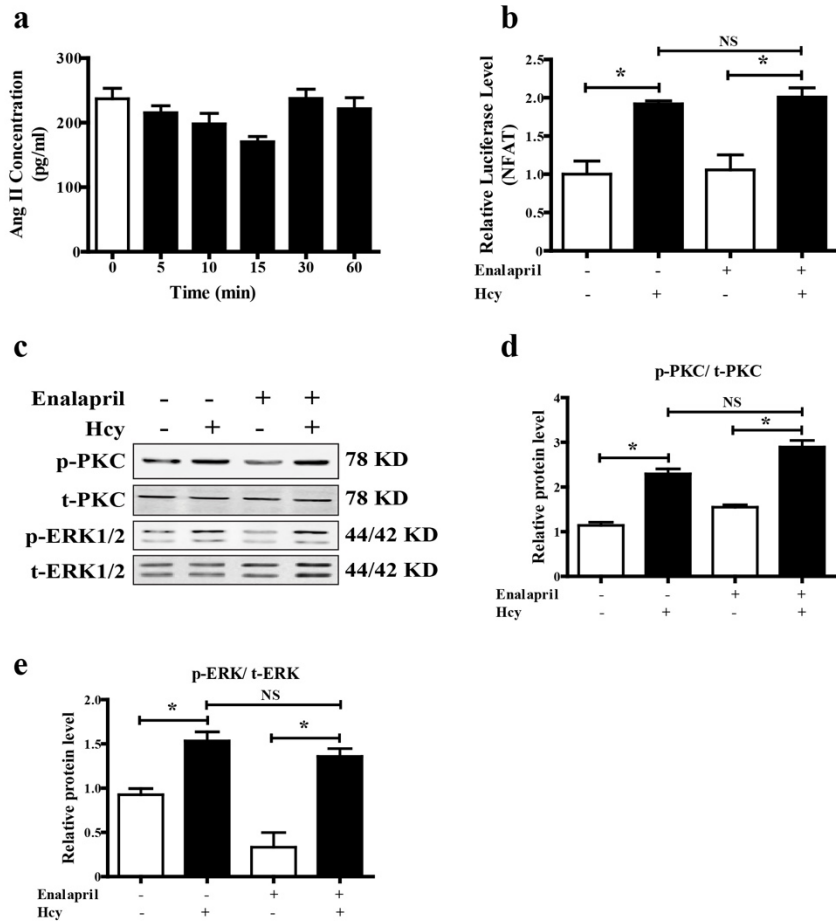

**Supplementary Figure 11. Hcy-induced AT1 receptor activation is not due to Ang II production.** **a**, Ang II concentration in Hcy (100  $\mu$ M)-treated HEK293A cells transfected with the human AT1 receptor. N=6. One-way ANOVA followed by the Bonferroni post hoc test. **b**, Hcy (100  $\mu$ M)-induced NFAT signaling with or without enalapril (1  $\mu$ M) pretreatment in HEK293A cells expressing the human AT1 receptor, detected by the dual luciferase assay system (Promega). The data represent as mean  $\pm$  SEM, N=6. \* $P$ <0.05. Two-way ANOVA followed by the Bonferroni post hoc test. **c-e**, Representative Western blots and quantification of phosphorylated and total PKC and ERK1/2 in Hcy (100  $\mu$ M)-treated HEK293A cells (transfected with the human AT1 receptor) with or without enalapril (1  $\mu$ M) pretreatment. The data represent as mean  $\pm$  SEM, N=6, \* $P$ <0.05. Two-way ANOVA followed by the Bonferroni post hoc test.

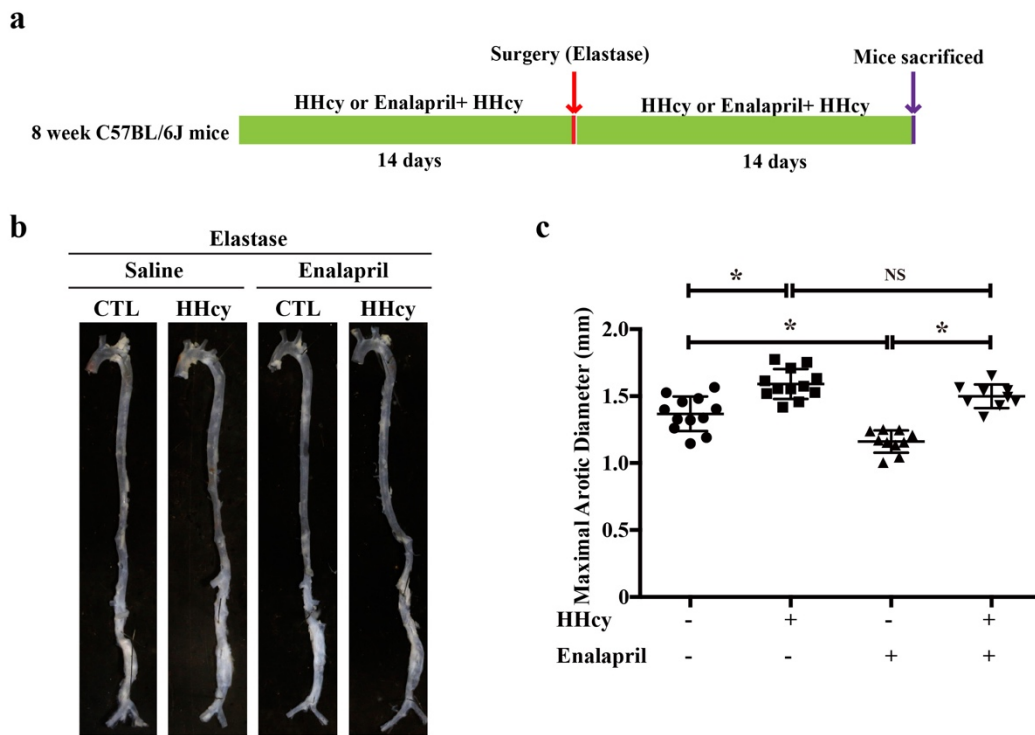

**Supplementary Figure 12. Enalapril treatment does not alleviate HHcy-aggravated AAA in mice.** **a**, Schematic flowcharts of animal models with HHcy induction, enalapril feeding or elastase treatment. **b**, Representative photographs of elastase-induced AAA in C57BL/6J mice fed with or without enalapril and Hcy. N=9-12. **c**, The quantification of the infrarenal abdominal aortic diameter in mice with elastase-induced aneurysms. The data represent as mean  $\pm$  SEM, N=9-12. \* $P$ <0.05. NS, no significance. Kruskal-Wallis test followed by Dunn's test.

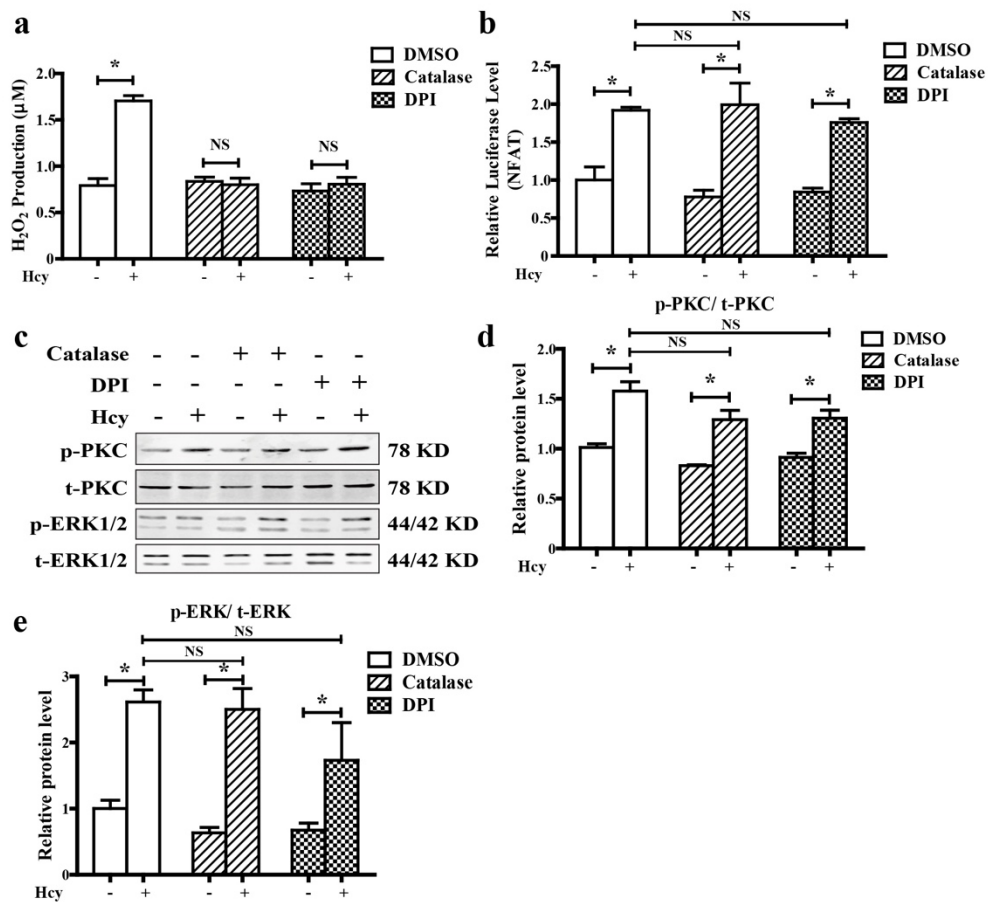

**Supplementary Figure 13. Hcy-induced AT1 receptor activation is not due to ROS production.** **a**, Hcy-induced H<sub>2</sub>O<sub>2</sub> production in HEK293A cells with or without the H<sub>2</sub>O<sub>2</sub> scavenger catalase (2000 U) or diphenyliodonium (DPI, 10 μM) pretreatment was detected by Amplex Red. The data represent as mean ± SEM, N=6. \**P*<0.05. NS, no significance. Two-way ANOVA followed by the Bonferroni post hoc test. **b**, Hcy (100 μM)-induced NFAT signaling with or without the H<sub>2</sub>O<sub>2</sub> scavenger catalase (2000 U) or DPI (10 μM) pretreatment in HEK293A cells expressing the human AT1 receptor, detected by the dual luciferase assay system (Promega). The data represent as mean ± SEM, N=6. \**P*<0.05. NS, no significance. Two-way ANOVA followed by the Bonferroni post hoc test. **c-e**, Representative Western blots and quantification of phosphorylated and total PKC and ERK1/2 in Hcy (100 μM)-treated HEK293A cells (transfected with the human AT1 receptor) with or without the H<sub>2</sub>O<sub>2</sub> scavenger catalase (2000 U) or DPI (10 μM) pretreatment. The data represent as mean ± SEM, N=6. \**P*<0.05. NS, no significance. Two-way ANOVA followed by the Bonferroni post hoc test.

**a**

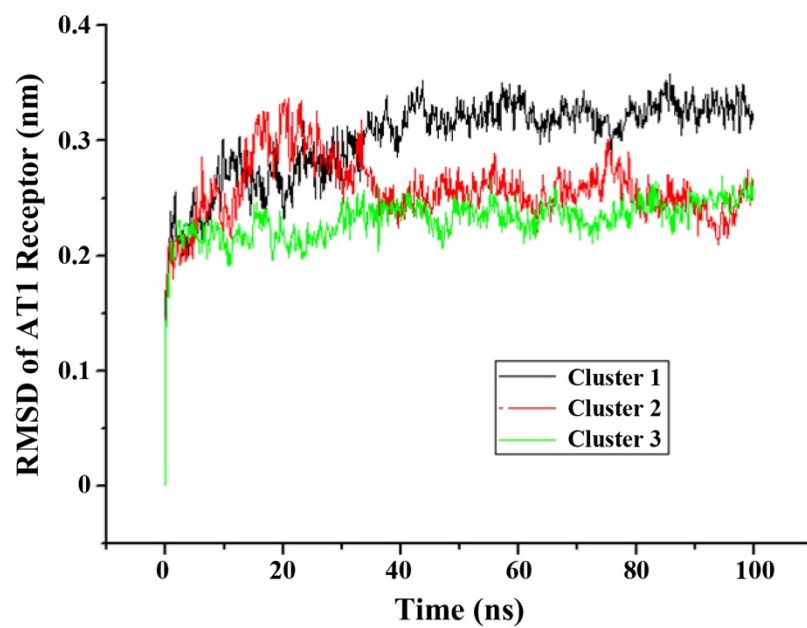

**b**

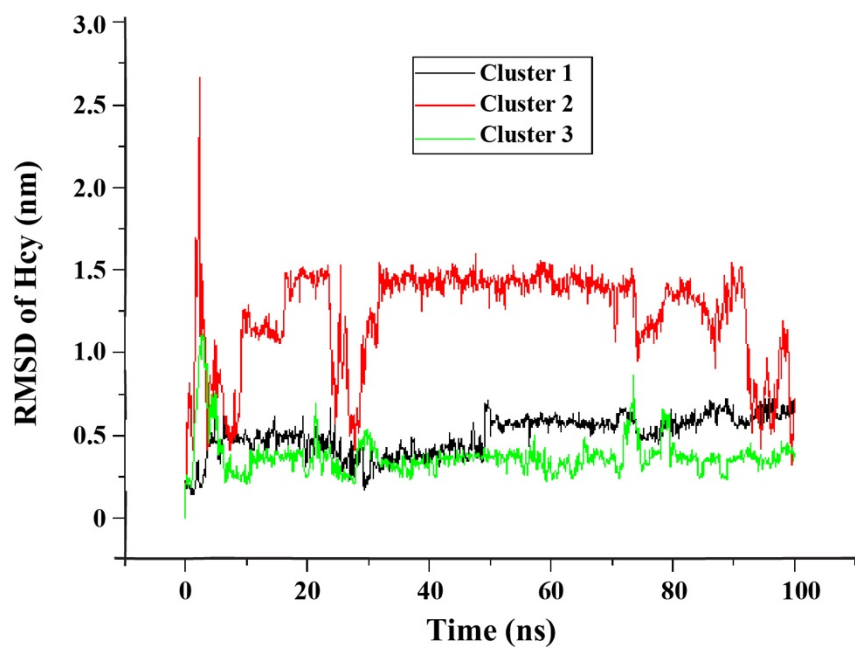

Supplementary Figure 14. RMSD of the AT1 receptor (a) and Hcy (b) in Cluster 1 to Cluster 3.

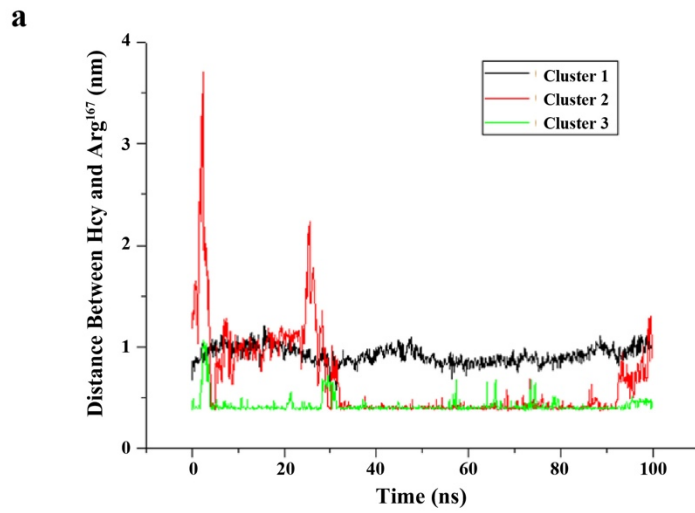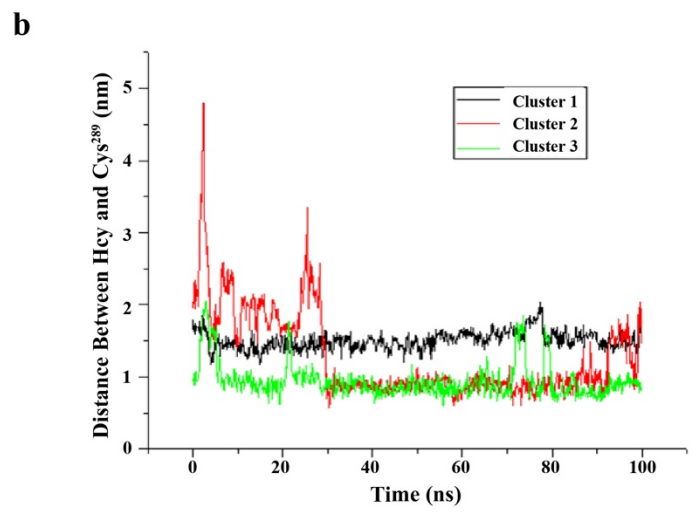

Supplementary Figure 15. Distance between Hcy and Arg<sup>167</sup> (a) or Cys<sup>289</sup> (b) of the AT1 receptor.



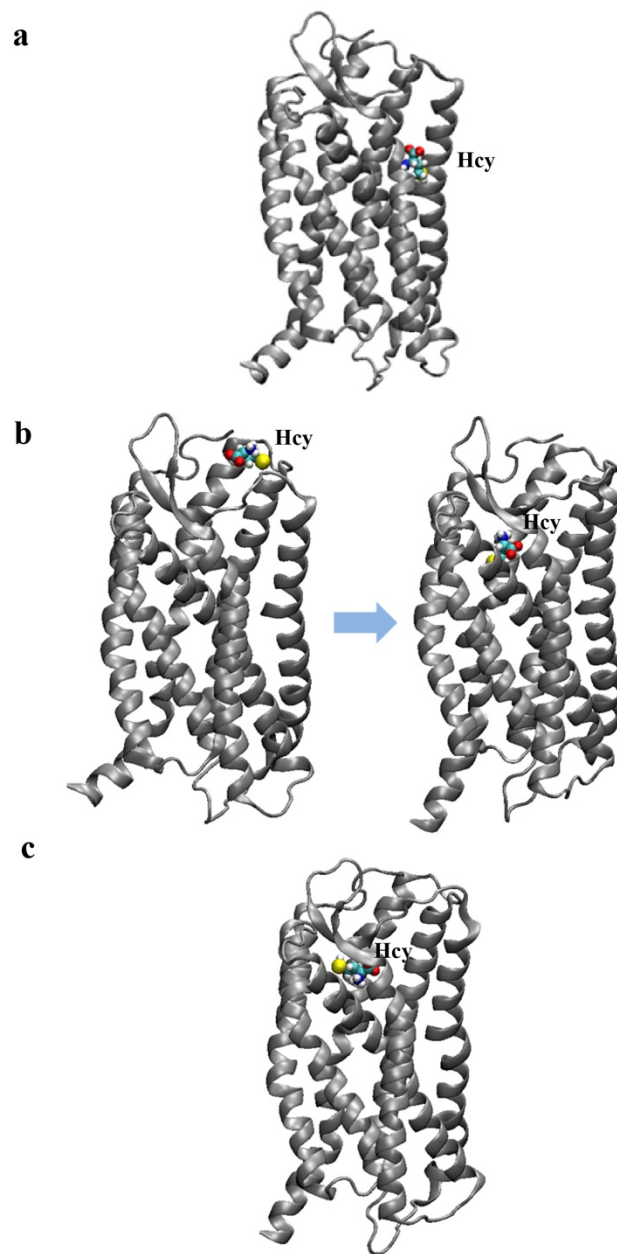

Supplementary Figure 16. Locations of Hcy in Cluster 1 (a), Cluster 2 (b) and Cluster 3 (c).

**a**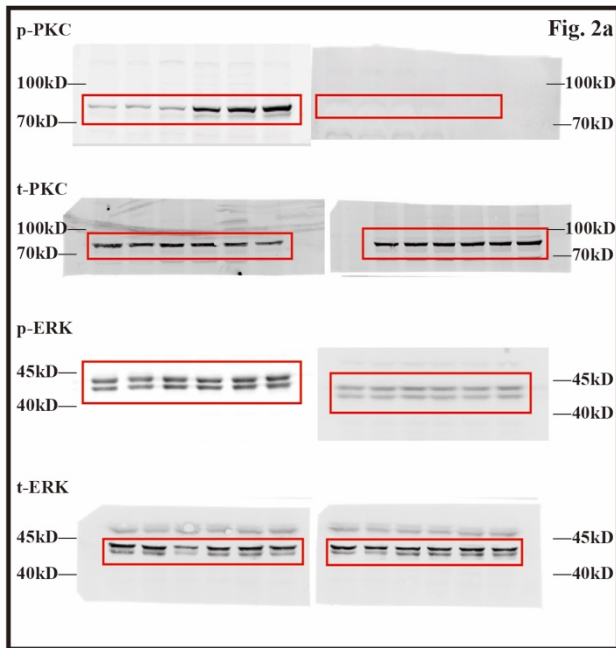**b**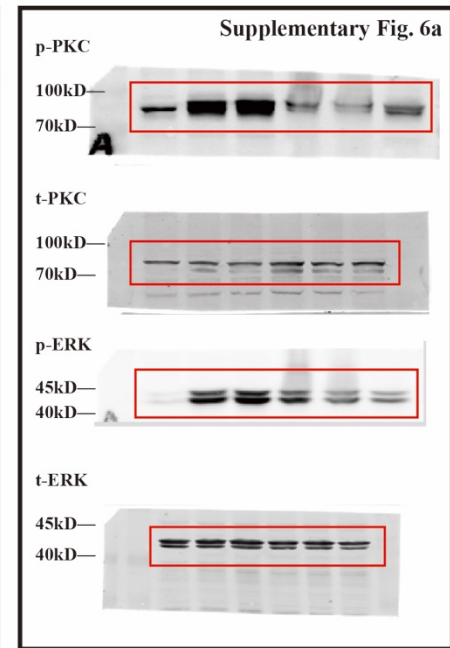**c**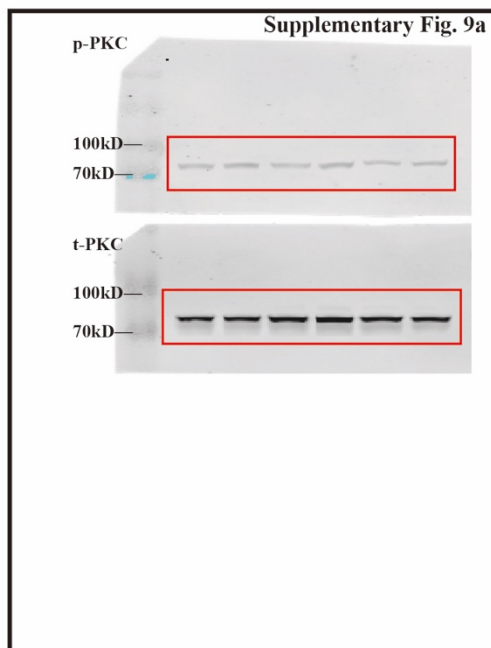**d**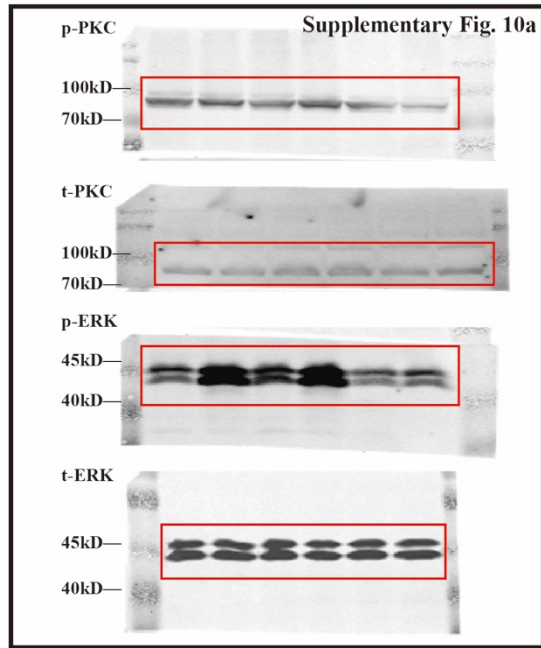

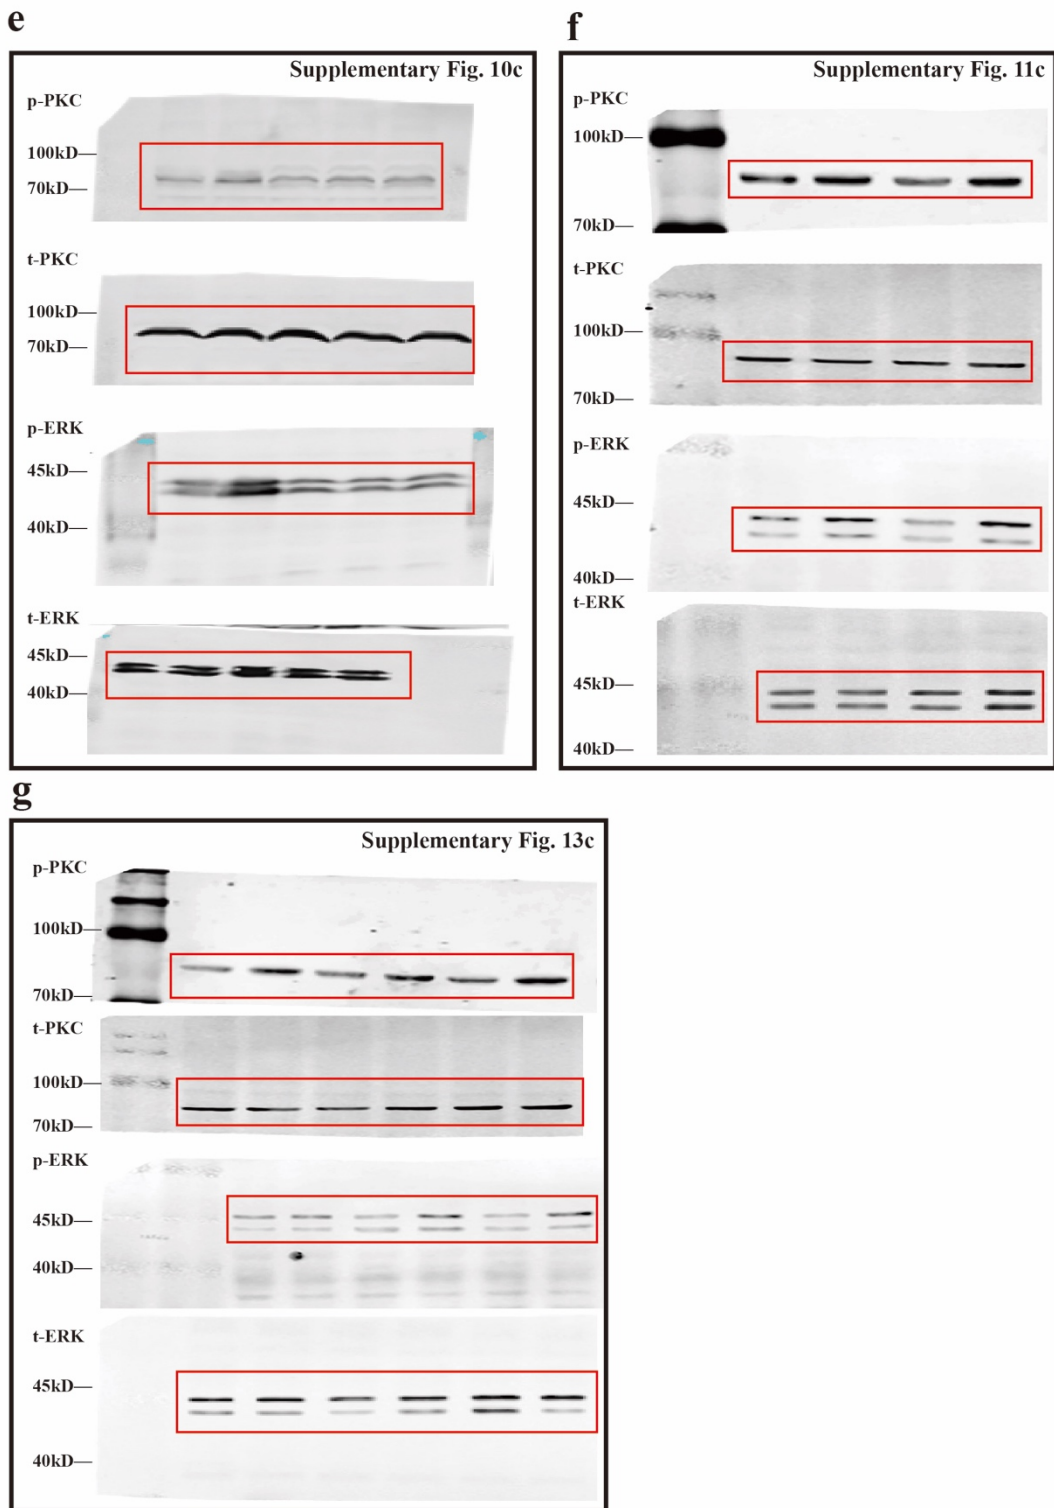

**Supplementary Figure 17. Full gel scans for western blot. a,** Gel scans for Fig. 2a. **b,** Gel scans for Supplementary Fig. 6a. **c,** Gel scans for Supplementary Fig. 9a. **d,** Gel scans for Supplementary Fig. 10a. **e,** Gel scans for Supplementary Fig. 10c. **f,** Gel scans for Supplementary Fig. 11c. **g,** Gel scans for Supplementary Fig. 13c.

**Supplementary Table 1. Characteristics of WT and *AT1a*<sup>-/-</sup> mice in elastase-induced AAA model fed with or without Hcy.**

| Group                 | sham       | Elastase      |               | sham                       | Elastase                   |                                 |
|-----------------------|------------|---------------|---------------|----------------------------|----------------------------|---------------------------------|
|                       | WT         | WT            | WT HHcy       | <i>AT1a</i> <sup>-/-</sup> | <i>AT1a</i> <sup>-/-</sup> | <i>AT1a</i> <sup>-/-</sup> HHcy |
| No.                   | 5          | 12            | 12            | 5                          | 12                         | 9                               |
| Weight (g)            | 25.2±1.5   | 23.1 ± 0.7    | 24.5 ± 0.8    | 23.6±1.6                   | 23.6 ± 0.5                 | 25.0 ± 0.7                      |
| SBP before (mmHg)     | 105.4±1.8  | 108.4 ± 4.3   | 109.2 ± 3.7   | 74.1±3                     | 74.3 ± 1.4*                | 73.6 ± 2.3*                     |
| SBP after (mmHg)      | 105.9±2.4  | 109.7 ± 2.4   | 107.3 ± 2.9   | 73.9±3.6                   | 70.3 ± 1.2*                | 71.9 ± 2.0*                     |
| Plasma Ang II (pg/ml) | 455.9±15.3 | 448.3 ± 12.76 | 470.3 ± 15.06 | 555.2±14.1                 | 522.6±18.73*               | 536.8 ± 9.64*                   |
| Plasma Total Hcy (μM) | 7.47±1.53  | 8.44 ± 0.75   | 25.28 ± 2.13† | 6.34±0.53                  | 8.10 ± 0.50                | 23.60 ± 2.70†                   |
| Plasma Free Hcy (μM)  | 0.29±0.04  | 0.28±0.01     | 0.58±0.02†    | 0.27±0.03                  | 0.21±0.01                  | 0.68±0.09†                      |
| TC (mM)               | 2.02±0.11  | 2.17 ± 0.09   | 2.12 ± 0.12   | 1.96±0.13                  | 1.92 ± 0.06                | 2.02 ± 0.11                     |
| TG (mM)               | 0.96±0.07  | 0.97 ± 0.08   | 1.14 ± 0.10   | 0.96±0.03                  | 1.01 ± 0.05                | 1.07 ± 0.10                     |

WT, wild type; HHcy, hyperhomocysteinemia; *AT1a*<sup>-/-</sup>, AT1a knockout; SBP, systolic blood pressure; Ang II, angiotensin II; Hcy, homocysteine; TC, total cholesterol; TG, triglyceride.

Data represent mean ± SEM. \**P*<0.05 compared to WT or WT HHcy mice with elastase induction accordingly. †*P*<0.05 compared to elastase-induced WT or *AT1a*<sup>-/-</sup> mice fed without Hcy accordingly.

**Supplementary Table 2. Characteristics of WT and *AT1a*<sup>-/-</sup> mice in**

**CaPO<sub>4</sub>-induced AAA model fed with or without Hcy and telmisartan.**

| Group                 | WT            | WT HHcy       | <i>AT1a</i> <sup>-/-</sup> | <i>AT1a</i> <sup>-/-</sup> HHcy |
|-----------------------|---------------|---------------|----------------------------|---------------------------------|
| No.                   | 9             | 9             | 12                         | 5                               |
| Weight (g)            | 26.6 ± 1.7    | 26.2 ± 0.8    | 26.9 ± 0.9                 | 26.3 ± 1.2                      |
| SBP before (mmHg)     | 102.8 ± 1.8   | 101.7 ± 2.1   | 72.5 ± 6.2*                | 72.9 ± 2.5*                     |
| SBP after (mmHg)      | 104.7 ± 1.9   | 104.9 ± 3.5   | 68.7 ± 2.0*                | 71.9 ± 1.8*                     |
| Plasma Ang II (pg/ml) | 437.9 ± 12.23 | 437.9 ± 16.48 | 539.9 ± 25.62*             | 524.9 ± 25.35*                  |
| Plasma Total Hcy (μM) | 7.84 ± 0.93   | 20.55 ± 3.21† | 9.40 ± 1.80                | 18.24 ± 3.10†                   |
| Plasma Free Hcy (μM)  | 0.29±0.08     | 0.61±0.07†    | 0.27±0.04                  | 0.59±0.11†                      |
| TC (mM)               | 1.87 ± 0.13   | 1.80 ± 0.04   | 1.98 ± 0.20                | 1.91 ± 0.20                     |
| TG (mM)               | 1.02 ± 0.28   | 1.16 ± 0.10   | 1.17 ± 0.43                | 1.26 ± 0.20                     |

WT, wild type; HHcy, hyperhomocysteinemia; *AT1a*<sup>-/-</sup>, AT1a knockout; SBP, systolic blood pressure; Ang II, angiotensin II; Hcy, homocysteine; TC, total cholesterol; TG, triglyceride.

Data represent mean ± SEM. \**P*<0.05 compared to WT or WT HHcy mice accordingly. †*P*<0.05 compared to WT or *AT1a*<sup>-/-</sup> mice fed without Hcy accordingly.

**Supplementary Table 3. Characteristics of C57BL/6J mice in CaPO<sub>4</sub>-induced AAA model fed with or without Hcy and telmisartan.**

| Group                 | CTL           | HHcy                      | Telmi          | Telmi + HHcy              |
|-----------------------|---------------|---------------------------|----------------|---------------------------|
| No.                   | 9             | 9                         | 8              | 7                         |
| Weight (g)            | 24.8 ± 0.5    | 23.3 ± 0.5                | 22.9 ± 0.6     | 22.7 ± 0.6                |
| SBP before (mmHg)     | 101.3 ± 2.1   | 103.9 ± 2.2               | 102.6 ± 2.7    | 106.0 ± 2.0               |
| SBP after (mmHg)      | 98.0 ± 3.4    | 106.6 ± 3.5               | 96.7 ± 4.2     | 96.8 ± 3.4                |
| Plasma Ang II (pg/ml) | 442.8 ± 20.27 | 435.1 ± 20.27             | 538.2 ± 19.69* | 521.5 ± 16.95*            |
| Plasma Total Hcy (μM) | 8.02 ± 0.73   | 25.75 ± 2.89 <sup>†</sup> | 10.64 ± 1.35   | 22.62 ± 2.94 <sup>†</sup> |
| TC (mM)               | 2.12 ± 0.10   | 2.12 ± 0.11               | 2.10 ± 0.04    | 2.09 ± 0.15               |
| TG (mM)               | 0.72 ± 0.03   | 0.61 ± 0.03               | 0.77 ± 0.07    | 0.72 ± 0.08               |

CTL, control; HHcy, hyperhomocysteinemia; Telmi, telmisartan; SBP, systolic blood pressure; Ang II, angiotensin II; Hcy, homocysteine; TC, total cholesterol; TG, triglyceride.

Data represent mean ± SEM. \**P*<0.05 compared to CTL or HHcy mice fed without telmisartan accordingly. <sup>†</sup>*P*<0.05 compared to CTL or Telmi mice fed without Hcy accordingly.

**Supplementary Table 4. Impact of Telmi (1  $\mu$ M) upon Hcy-induced  $\text{Ca}^{2+}$  signaling.**

|             | -Log [EC <sub>50</sub> (M)] | Maximum Responses (%) |
|-------------|-----------------------------|-----------------------|
| Hcy         | 4.09 $\pm$ 0.39             | 96.4 $\pm$ 11.9       |
| Telmi + Hcy | 4.77 $\pm$ 1.37             | 23.8 $\pm$ 4.38*      |

The data represent the mean  $\pm$  SEM from 3 independent experiments performed in duplicate or triplicate. \* $p$ <0.05.

**Supplementary Table 5. Impact of Telmi (1  $\mu$ M) upon Hcy-induced NFAT signaling.**

|             | -Log [EC <sub>50</sub> (M)] | Maximum Responses (%) |
|-------------|-----------------------------|-----------------------|
| Hcy         | 5.26 $\pm$ 0.11             | 104 $\pm$ 3.16        |
| Telmi + Hcy | 4.70 $\pm$ 0.62             | 16.5 $\pm$ 2.58*      |

The data represent the mean  $\pm$  SEM from 3 independent experiments performed in duplicate or triplicate. \* $p$ <0.05.



**Supplementary Table 6. Characteristics of C57BL/6J mice in Elastase-induced AAA model fed with or without Hcy and enalapril.**

| Group                                     | CTL        | HHcy                    | Enalapril   | Enalapril<br>+HHcy      |
|-------------------------------------------|------------|-------------------------|-------------|-------------------------|
| No.                                       | 11         | 9                       | 11          | 9                       |
| Weight (g)                                | 26.2±0.3   | 24.4±0.9                | 25.0±0.6    | 26.9±0.8                |
| SBP before (mmHg)                         | 101.2±1.6  | 105.2±2.3               | 102.3±3.4   | 99.7±2.9                |
| SBP after (mmHg)                          | 107.8±1.4  | 109.1±1.6               | 84±1.3*     | 82.44±1.6*              |
| Plasma Total Hcy (μM)                     | 6.17±0.46  | 25.24±2.48 <sup>†</sup> | 5.83±0.52   | 25.38±1.19 <sup>†</sup> |
| Plasma Ang II (pg/ml)                     | 450.1±19.5 | 489.5±29.8              | 270.6±13.3* | 295.6±13.6*             |
| Plasma Renin Activity<br>(ng Ang I/ml.hr) | 3.21±0.43  | 3.01±0.24               | 36.54±3.50* | 35.99±2.09*             |

HHcy, hyperhomocysteinemia; SBP, systolic blood pressure; Hcy, homocysteine;

Data represent mean ± SEM. \* $P < 0.05$  compared to CTL or HHcy mice fed without enalapril accordingly. <sup>†</sup> $P < 0.05$  compared to CTL or enalapril mice fed without Hcy accordingly.

**Supplementary Table 7. Impact of Hcy (100  $\mu$ M) upon Ang II-induced  $\text{Ca}^{2+}$  signaling.**

|              | -Log [EC <sub>50</sub> (M)] | Maximum Responses (%) |
|--------------|-----------------------------|-----------------------|
| Ang II       | 11.8 $\pm$ 0.18             | 99.7 $\pm$ 5.03       |
| Ang II + Hcy | 10.7 $\pm$ 0.23*            | 152 $\pm$ 10.3*       |

The data represent the mean  $\pm$  SEM from 3 independent experiments performed in duplicate or triplicate. \* $p$ <0.05.

**Supplementary Table 8. Impact of Hcy upon Ang II-induced NFAT signaling.**

|                       | -Log [EC <sub>50</sub> (M)] | Maximum Responses (%) |
|-----------------------|-----------------------------|-----------------------|
| Ang II                | 7.10 ± 0.22                 | 98.22 ± 5.67          |
| Ang II + Hcy (30 μM)  | 7.39 ± 0.08                 | 109.4 ± 2.14          |
| Ang II + Hcy (60 μM)  | 7.39 ± 0.18                 | 119.6 ± 4.98*         |
| Ang II + Hcy (100 μM) | 7.61 ± 0.14                 | 152.7 ± 4.57*         |

The data represent the mean ± SEM from 3 independent experiments performed in duplicate or triplicate. \* $p < 0.05$ .

**Supplementary Table 9. Primer sequences for real time PCR.**

| Gene                 | Primer    | Primer Sequence              |
|----------------------|-----------|------------------------------|
| Mouse AT1a           | Sense     | 5'-GCCCTGGCTGACTTATGCTT-3'   |
|                      | Antisense | 5'-ACACATTTTCGGTGGATGACGG-3' |
| Mouse AGT            | Sense     | 5'-ATCCCTTAAACTTTCACAACC-3'  |
|                      | Antisense | 5'-CGGAACTTCTAGCACACC-3'     |
| Mouse ACE            | Sense     | 5'-ATTTGGCAGAACTTTACTGAC-3'  |
|                      | Antisense | 5'-CAAACAACA ACTTGGCATAG-3'  |
| Mouse Renin          | Sense     | 5'- CCACCTTCATCCGCAAGTTC-3'  |
|                      | Antisense | 5'- GGGCAACACTCGTTAGGGTCT-3' |
| Mouse $\beta$ -actin | Sense     | 5'-ATCTGGCACCACACCTTC-3'     |
|                      | Antisense | 5'-AGCCAGGTCCAGACGCA-3'      |
